# Supplementary material for: Simulating secondary organic aerosol in a regional air quality model using the statistical oxidation model – Part 1: Assessing the influence of constrained multi-generational ageing
Source: Copernicus journal article supplement (doi:10.5194/acp-16-2309-2016), 2016-02-26
Supplement: Supplementary file 1 [file acp-16-2309-2016-supplement.pdf]

Supplement of Atmos. Chem. Phys., 16, 2309–2322, 2016  
<http://www.atmos-chem-phys.net/16/2309/2016/>  
doi:10.5194/acp-16-2309-2016-supplement  
© Author(s) 2016. CC Attribution 3.0 License.

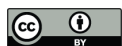

Atmospheric  
Chemistry  
and Physics  
Open Access  
EGU

*Supplement of*

## **Simulating secondary organic aerosol in a regional air quality model using the statistical oxidation model – Part 1: Assessing the influence of constrained multi-generational ageing**

**S. H. Jathar et al.**

*Correspondence to:* C. D. Cappa ([cdcappa@ucdavis.edu](mailto:cdcappa@ucdavis.edu)) and M. J. Kleeman ([mjkleeman@ucdavis.edu](mailto:mjkleeman@ucdavis.edu))

The copyright of individual parts of the supplement might differ from the CC-BY 3.0 licence.

Table S.1: Details of the chemical transport model and modeling system used in this work.

| Domain                      | California                                                                                                  | Eastern US                                                                                  |
|-----------------------------|-------------------------------------------------------------------------------------------------------------|---------------------------------------------------------------------------------------------|
| Resolution                  | 24 km, nested 8 km                                                                                          | 36 km                                                                                       |
| Grid cells                  | 44 x 43; 63 x 30                                                                                            | 65 x 65                                                                                     |
| Time Period                 | July 15 - Aug 2, 2005                                                                                       | Aug 15 - Sep 2, 2006                                                                        |
| Meteorology                 | WRF v3.4 run with NAM reanalysis data                                                                       |                                                                                             |
| Emissions                   | Anthropogenics: CARB (2000)<br>Wildfires: NCAR<br>Biogenics: MEGAN<br>Gridded using UCD emissions processor | Anthropogenics+Wildfires: NEI (2005)<br>Biogenics: MEGAN<br>Gridded using SMOKE version 2.5 |
| Gas-phase mechanism         | SAPRC-11 (Carter and Heo, 2013)                                                                             |                                                                                             |
| Inorganics                  | ISORROPIA (Nenes et al., 1998)                                                                              |                                                                                             |
| Initial/Boundary conditions | MOZART-NCEP (Emmons et al., 2010)                                                                           |                                                                                             |
| SOA model                   | 2-product model, acid-catalyzed SOA from isoprene, oligomerization, (Carlton et al., 2010)                  |                                                                                             |

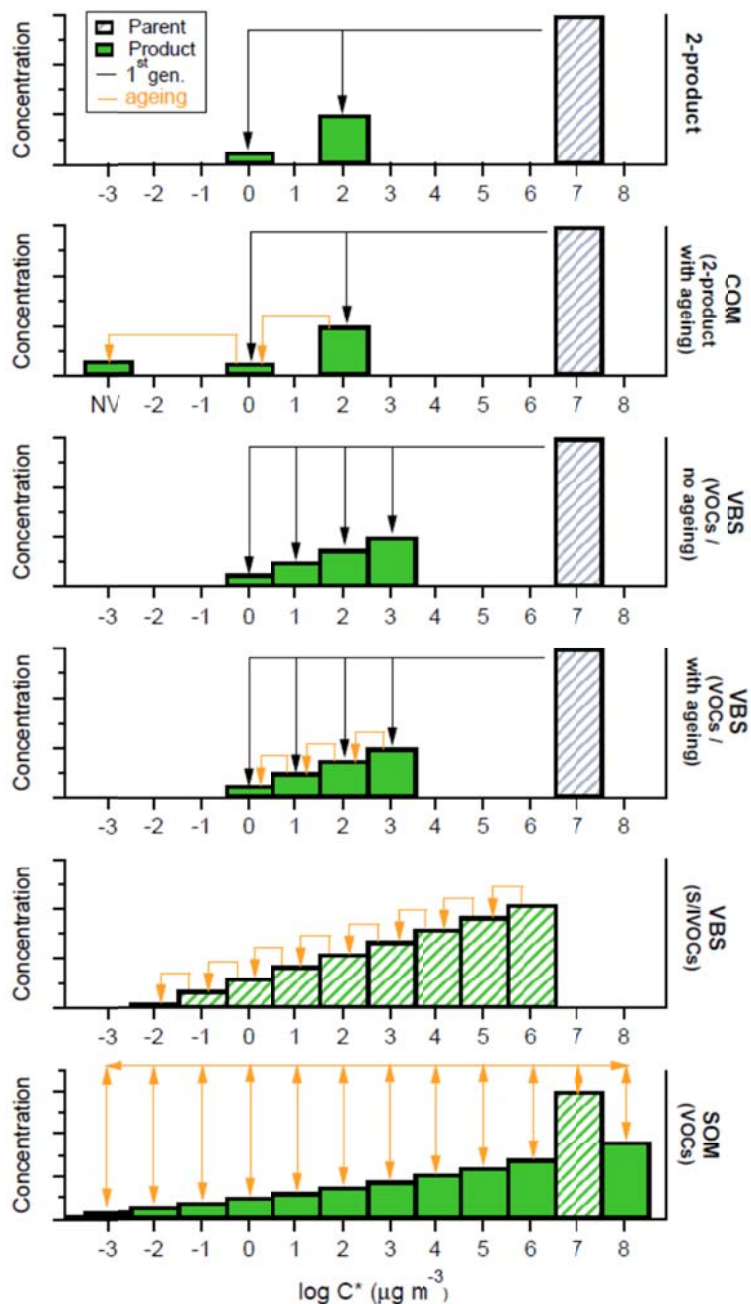

Figure S.1: Schematic illustrating the differences between some of the different ways of modeling SOA. From top to bottom: the 2-product model; the COM-type model, i.e. 2-product with ageing; the VBS as applied to VOCs with no ageing; the VBS as applied to VOCs with additional ageing; the VBS as applied to S/IVOCs; and the SOM. The black arrows indicate the production of products directly from the parent VOC and the orange arrows indicate ageing reactions, i.e. reactions involving product species. For the SOM, all species are reactive and both functionalization and fragmentation are possible. In the other models that include ageing, only functionalization reactions are included, i.e. reactions that decrease compound vapor pressures.

Table S.2: SAPRC-11 model species, surrogate molecules and BaseM parameters for two-product model.

| SAPRC-11 Species | Descriptor           | Surrogate to determine BaseM fits | NO <sub>x</sub> | K <sub>p</sub> |       | α     |       | Reference                                       |
|------------------|----------------------|-----------------------------------|-----------------|----------------|-------|-------|-------|-------------------------------------------------|
| ALK_C06          | Long alkanes         | <i>n</i> -dodecane                | Low             | 0.200          | 0.010 | 0.001 | 0.016 | Loza et al. (2014)                              |
|                  |                      |                                   | High            | 0.200          | 0.010 | 0.001 | 0.020 |                                                 |
| ALK_C07          | Long alkanes         | <i>n</i> -dodecane                | Low             | 0.200          | 0.010 | 0.000 | 0.028 | Loza et al. (2014)                              |
|                  |                      |                                   | High            | 0.200          | 0.010 | 0.003 | 0.039 |                                                 |
| ALK_C08          | Long alkanes         | <i>n</i> -dodecane                | Low             | 0.200          | 0.010 | 0.000 | 0.088 | Loza et al. (2014)                              |
|                  |                      |                                   | High            | 0.200          | 0.010 | 0.005 | 0.079 |                                                 |
| ALK_C09          | Long alkanes         | <i>n</i> -dodecane                | Low             | 0.200          | 0.010 | 0.003 | 0.147 | Loza et al. (2014)                              |
|                  |                      |                                   | High            | 0.200          | 0.010 | 0.013 | 0.106 |                                                 |
| ALK_C10          | Long alkanes         | <i>n</i> -dodecane                | Low             | 0.200          | 0.010 | 0.009 | 0.232 | Loza et al. (2014)                              |
|                  |                      |                                   | High            | 0.200          | 0.010 | 0.024 | 0.158 |                                                 |
| ALK_C11          | Long alkanes         | <i>n</i> -dodecane                | Low             | 0.200          | 0.010 | 0.018 | 0.341 | Loza et al. (2014)                              |
|                  |                      |                                   | High            | 0.200          | 0.010 | 0.045 | 0.183 |                                                 |
| ALK_C12          | Long alkanes         | <i>n</i> -dodecane                | Low             | 0.200          | 0.010 | 0.035 | 0.447 | Loza et al. (2014)                              |
|                  |                      |                                   | High            | 0.200          | 0.010 | 0.070 | 0.228 |                                                 |
| ALK_C13          | Long alkanes         | <i>n</i> -dodecane                | Low             | 0.200          | 0.010 | 0.083 | 0.441 | Loza et al. (2014)                              |
|                  |                      |                                   | High            | 0.200          | 0.010 | 0.108 | 0.201 |                                                 |
| Benzene          | Benzene              | Benzene                           | Low             | 0.283          | 0.026 | 0.281 | 0.127 | Ng et al. (2007)                                |
|                  |                      |                                   | High            | 100.000        | 0.013 | 0.074 | 0.642 |                                                 |
| ARO1             | High-yield aromatics | Toluene                           | Low             | 0.215          | 0.001 | 0.617 | 0.001 | Zhang et al. (2014)                             |
|                  |                      |                                   | High            | 18.502         | 0.023 | 0.021 | 0.537 |                                                 |
| ARO2             | Low-yield aromatics  | <i>m</i> -xylene                  | Low             | 0.269          | 0.111 | 0.322 | 0.080 | Ng et al. (2007)                                |
|                  |                      |                                   | High            | 0.160          | 0.001 | 0.078 | 0.001 |                                                 |
| Isoprene         | Isoprene             | Isoprene                          | Low             | 5.434          | 0.008 | 0.021 | 0.594 | Chhabra et al. (2011)                           |
|                  |                      |                                   | High            | 0.136          | 0.003 | 0.004 | 0.409 |                                                 |
| TRP1/SESQ        | Terpenes             | α-pinene                          | Low             | 100.000        | 0.004 | 0.102 | 0.671 | Chhabra et al. (2011),<br>Griffin et al. (1999) |
|                  |                      |                                   | High            | 0.549          | 0.009 | 0.046 | 0.489 |                                                 |

Table S.3: SAPRC-11 model species, corresponding SOM grids, surrogate molecules, SOM parameters and O:C. Reproduced from Jathar et al. (2015)

| SAPRC-11 Species   | SOM Grid             | Surrogate to determine SOM fits | NO <sub>x</sub> | <i>ALVP</i> | <i>p<sub>o</sub></i> |        |        |        | <i>m<sub>frag</sub></i> | O:C (end-of-experiment) |
|--------------------|----------------------|---------------------------------|-----------------|-------------|----------------------|--------|--------|--------|-------------------------|-------------------------|
|                    |                      |                                 |                 |             | Low                  | High   | Low    | High   |                         |                         |
| ALK_C06 to ALK_C13 | Long alkanes         | <i>n</i> -dodecane              | Low             | 1.5400      | 0.7170               | 0.2780 | 0.0028 | 0.0022 | 0.1220                  |                         |
|                    |                      |                                 | High            | 1.3900      | 0.9270               | 0.0101 | 0.0180 | 0.0445 | 0.0980                  |                         |
| Benzene            | Benzene              | Benzene                         | Low             | 2.0100      | 0.7690               | 0.0010 | 0.0505 | 0.1800 | 2.0100                  |                         |
|                    |                      |                                 | High            | 1.7000      | 0.0792               | 0.0010 | 0.9190 | 0.0010 | 0.5350                  |                         |
| ARO1               | High-yield aromatics | Toluene                         | Low             | 1.8400      | 0.5610               | 0.0010 | 0.0010 | 0.4380 | 0.0100                  |                         |
|                    |                      |                                 | High            | 1.2400      | 0.0029               | 0.0010 | 0.0010 | 1.0100 | 0.2220                  |                         |
| ARO2               | Low-yield aromatics  | <i>m</i> -xylene                | Low             | 1.7600      | 0.7350               | 0.0010 | 0.0020 | 0.2620 | 0.0100                  |                         |
|                    |                      |                                 | High            | 1.6800      | 0.9360               | 0.0010 | 0.0021 | 0.0609 | 0.0100                  |                         |
| Isoprene           | Isoprene             | Isoprene                        | Low             | 2.2600      | 0.9730               | 0.0010 | 0.0010 | 0.0260 | 0.0100                  |                         |
|                    |                      |                                 | High            | 1.9400      | 0.9520               | 0.0011 | 0.0304 | 0.0163 | 0.0632                  |                         |
| TRP1/SESQ          | Terpenes             | □-pinene                        | Low             | 1.8700      | 0.0010               | 0.8690 | 0.0776 | 0.0525 | 0.0100                  |                         |
|                    |                      |                                 | High            | 1.6200      | 0.0680               | 0.6330 | 0.2750 | 0.0244 | 0.0353                  |                         |

## Cascading Oxidation Model (COM)

The Cascading Oxidation Model (COM) is based on the implementation of the multi-generational oxidation scheme in Baek et al. (2011). It is described in Table S.4 and can be demonstrated using the following example. In the Base model, benzene formed two semi-volatile products under high NO<sub>x</sub> conditions (low-volatility product SV\_BNZ1 and high-volatility product SV\_BNZ2) and one non-volatile product under low NO<sub>x</sub> conditions (SV\_BNZ3). Under the multi-generational oxidation scheme, the vapors of the high-volatility product, SV\_BNZ2, were allowed to react with the OH radical using the same reaction rate constant as the parent (in this case, benzene) to form the low-volatility product, SV\_BNZ1. In turn, the vapors of the low-volatility product, SV\_BNZ1, were allowed to react with the OH radical using the same reaction rate constant as the parent to the non-volatile product SV\_BNZ3. The scheme was extended for all the Base model species.

Table S.4: Reactions added to SAPRC-11 to model multi-generational oxidation of SOA. For consistency, the names of the SAPRC-11 model species and the Base model species are kept the same as those described in CMAQ v4.7 (Carlton et al., 2010). The species SV\_ALK2, SV\_ISO4, SV\_TRP3 and SV\_SQT2, denoted with an asterisk, are new non-volatile species added to SAPRC-11.

| VOC                  | SAPRC-11 model species | Semi-volatile Base model species | Multi-generational aging reactions added to SAPRC11 |
|----------------------|------------------------|----------------------------------|-----------------------------------------------------|
| Alkanes              | ALK5                   | SV_ALK                           | SV_ALK + OH = SV_ALK2*                              |
| Benzene              | BENZENE                | SV_BNZ1,<br>SV_BNZ2              | SV_BNZ2 + OH = SV_BNZ1<br>SV_BNZ1 + OH = SV_BNZ3    |
| High-yield aromatics | ARO1                   | SV_TOL1,<br>SV_TOL2              | SV_TOL2 + OH = SV_TOL1<br>SV_TOL1 + OH = SV_TOL3    |
| Low-yield aromatics  | ARO2                   | SV_XYL1,<br>SV_XYL2              | SV_XYL2 + OH = SV_XYL1<br>SV_XYL1 + OH = SV_XYL3    |
| Isoprene             | ISOPRENE               | SV_ISO1,<br>SV_ISO2              | SV_ISO1 + OH = SV_ISO2<br>SV_ISO2 + OH = SV_ISO4*   |
| Terpenes             | TRP1                   | SV_TRP1,<br>SV_TRP2              | SV_TRP2 + OH = SV_TRP1<br>SV_TRP1 + OH = SV_TRP3*   |
| Sesquiterpenes       | SESQ                   | SV_SQT                           | SV_SQT + OH = SV_SQT2*                              |

For the South Coast Air Basin (SoCAB), the organic aerosol (OA) predictions from the COM simulation were modestly higher than the Base simulation (predicted mean at STN sites increased from 5.5  $\mu\text{g m}^{-3}$  to 8.1  $\mu\text{g m}^{-3}$  and that at IMPROVE sites increased from 2.4  $\mu\text{g m}^{-3}$  to 4.6  $\mu\text{g m}^{-3}$ ), bringing the model-measurement comparison (aggregated across three STN and three IMPROVE sites) within the ‘good model performance’ criteria set by EPA (fractional bias  $< \pm 35\%$  and fractional error  $< 50\%$ ) (Morris et al., 2005). In SoCAB, OA was dominated by POA and hence changes in OA concentrations were modest despite a factor of 4 to 8 increase in secondary organic aerosol (SOA) concentrations. In contrast, the OA predictions from the COM simulation for the eastern US changed substantially; predicted mean at STN sites increased from 2.8  $\mu\text{g m}^{-3}$  to 7.6  $\mu\text{g m}^{-3}$  and that at IMPROVE sites increased from 2.3  $\mu\text{g m}^{-3}$  to 7.4  $\mu\text{g m}^{-3}$ . However, that change did not lead to an improvement in the model-measurement comparison,

i.e. the fractional bias changed from a large negative bias (-48%) to a large positive bias (36%) and had no effect on the fractional error.

Table S.5: Domain- and episode-averaged SOA concentrations in  $\mu\text{g m}^{-3}$  from different precursors for the BaseM and SOM simulations for SoCAB and the eastern US. The direction of the arrow shows increase (up arrow), no change (horizontal arrow) or decrease (down arrow) in averaged SOA concentrations for the SOM simulations relative to the BaseM simulations.

| SOA precursor  | SoCAB |         | Eastern US |         |
|----------------|-------|---------|------------|---------|
|                | BaseM | SOM     | BaseM      | SOM     |
| Alkanes        | 0.001 | 0.003 ↑ | 0.009      | 0.021 ↑ |
| Aromatics      | 0.037 | 0.047 ↑ | .110       | 0.112 → |
| Isoprene       | 0.066 | 0.043 ↓ | .166       | 0.150 ↓ |
| Monoterpenes   | 0.227 | 0.149 ↓ | .521       | 0.400 ↓ |
| Sesquiterpenes | 0.043 | 0.044 → | .297       | 0.342 ↑ |

### Thermodenuder Model

The model of Cappa and Jimenez (2010) ([Cappa and Jimenez, 2010](#)) was used to simulate evaporation of SOA particles in a thermodenuder (TD). The TD design considered here used a plug flow residence time of 30 seconds in the heated section and 15 seconds in the denuder section. In the heated section the temperature increased from 25 C to the target temperature in 6 seconds. Cooling in the heated section began 80% of the way through the heated section. Vapors were assumed to be lost to the walls of the denuder section only. Monodisperse particles were assumed with an initial diameter of 120 nm. The accommodation coefficient was assumed to be unity, and the diffusivity of the evaporating molecules was assumed to be  $3.9 \times 10^{-5} \text{ m}^2 \text{ s}^{-1}$ . Evaporation from the particles was treated dynamically. The SOA concentration at 25 C was assumed in all simulations to be  $1 \mu\text{g m}^{-3}$ .

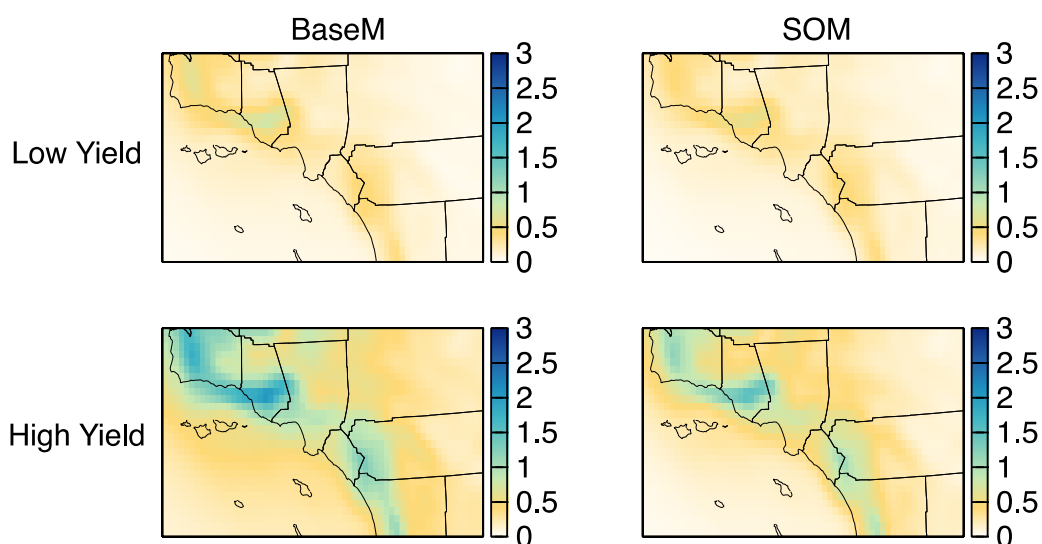

Figure S.2: 14-day averaged SOA concentrations in SoCAB for the BaseM and SOM simulations for the low-yield and high-yield parameterizations.

## References

Cappa, C. D., and Jimenez, J. L.: Quantitative estimates of the volatility of ambient organic aerosol, *Atmospheric Chemistry & Physics*, 10, 5401-5924, doi:10.5194/acp-10-5409-2010, 2010.

Carlton, A. G., Bhave, P. V., Napelenok, S. L., Edney, E. O., Sarwar, G., Pinder, R. W., Pouliot, G. A., and Houyoux, M.: Model representation of secondary organic aerosol in CMAQv4. 7, *Environmental Science & Technology*, 44, 8553-8560, 2010.

Jathar, S. H., Cappa, C. D., Wexler, A. S., Seinfeld, J. H., and Kleeman, M. J.: Multi-generational oxidation model to simulate secondary organic aerosol in a 3-D air quality model, *Geosci. Model Dev.*, 8, 2553-2567, 10.5194/gmd-8-2553-2015, 2015.

Morris, R. E., McNally, D. E., Tesche, T. W., Tonnesen, G., Boylan, J. W., and Brewer, P.: Preliminary evaluation of the Community Multiscale Air Quality model for 2002 over the southeastern United States, *Journal of the Air & Waste Management Association*, 55, 1694-1708, 2005.
